# Supplementary material for: Investigating the regulatory role of HvANT2 in anthocyanin biosynthesis through protein–motif interaction in Qingke
Source: PeerJ. 2024 Jul 10;12:e17736. doi: 10.7717/peerj.17736 (PMC11246018; doi:10.7717/peerj.17736)
Supplement: Supplemental Information 5 [file peerj-12-17736-s005.xlsx]

## Sheet: Sheet1
	root						stem				leaf
Kunlun 10	Early milk	0.0273545	0.0151469	0.029571	0.0240241	Kunlun 10	Early milk	0.0249133	0.0394216	0.0145384	Early milk	0.00833427	0.0143795	0.00780503
Kunlun 10	Late milk	1.00304	1.00369	1.00319	1.00331	Kunlun 10	Late milk	0.311889	0.300517	0.290417	Late milk	0.0736575	0.10457	0.0478991
Kunlun 10	Early dough	0.797303	0.780595	0.773436	0.783778	Kunlun 10	Early dough	0.484636	0.466881	0.388094	Early dough	0.902838	0.653563	0.445373
Nierumuzha	Early milk	0.0520264	0.0473072	0.0504824	0.0499387	Nierumuzha	Early milk	0.0149674	0.0204853	0.00934975	Early milk	0.0524626	0.0369155	0.0430079
Nierumuzha	Late milk	0.208781	0.141058	0.242918	0.197586	Nierumuzha	Late milk	0.0858512	0.181858	0.0753836	Late milk	0.821143	1.03229	1.17972
Nierumuzha	Early dough	0.142899	0.12821	0.0850333	0.118714	Nierumuzha	Early dough	0.0418159	0.0248386	0.0212397	Early dough	0.842698	0.822207	0.712042
	awn						seed coat
Kunlun 10	Early milk	0.138927	0.134795	0.139968	0.137897	Kunlun 10	Early milk	17.6185	16.9856	17.9314
Kunlun 10	Late milk	0.702583	0.687213	0.740269	0.710022	Kunlun 10	Late milk	9.32582	10.02	9.40994
Kunlun 10	Early dough	0.0830632	0.0779126	0.0878244	0.0829334	Kunlun 10	Early dough	21.199	21.3098	21.3559
Nierumuzha	Early milk	0.570665	0.589567	0.551559	0.570597	Nierumuzha	Early milk	7.19931	6.96855	7.16126
Nierumuzha	Late milk	0.139367	0.129877	0.13	0.133081	Nierumuzha	Late milk	112.005	111.325	112.938
Nierumuzha	Early dough	1	1.0024	1	1.0008	Nierumuzha	Early dough	88.001	89.1355	87.2124
